# Supplementary material
Source: publisher figshare collection journal article supplement (https://acs.figshare.com/ndownloader/files/3955552)
Supplement: Supplementary file 1 [file 3955552]

 
data_compound1
 
_audit_creation_method            SHELXL-97
_chemical_name_systematic
;
 ?
;
_chemical_name_common             ?
_chemical_melting_point           ?
_chemical_formula_moiety          'C54 H40 Cd2 N8 O16'
_chemical_formula_sum
 'C54 H40 Cd2 N8 O16'
_chemical_formula_weight          1281.74
 
loop_
 _atom_type_symbol
 _atom_type_description
 _atom_type_scat_dispersion_real
 _atom_type_scat_dispersion_imag
 _atom_type_scat_source
 'C'  'C'   0.0033   0.0016
 'International Tables Vol C Tables 4.2.6.8 and 6.1.1.4'
 'H'  'H'   0.0000   0.0000
 'International Tables Vol C Tables 4.2.6.8 and 6.1.1.4'
 'N'  'N'   0.0061   0.0033
 'International Tables Vol C Tables 4.2.6.8 and 6.1.1.4'
 'O'  'O'   0.0106   0.0060
 'International Tables Vol C Tables 4.2.6.8 and 6.1.1.4'
 'Cd'  'Cd'  -0.8075   1.2024
 'International Tables Vol C Tables 4.2.6.8 and 6.1.1.4'
 
_symmetry_cell_setting            Monoclinic
_symmetry_space_group_name_H-M    'C2/c'
 
loop_
 _symmetry_equiv_pos_as_xyz
 'x, y, z'
 '-x, y, -z+1/2'
 'x+1/2, y+1/2, z'
 '-x+1/2, y+1/2, -z+1/2'
 '-x, -y, -z'
 'x, -y, z-1/2'
 '-x+1/2, -y+1/2, -z'
 'x+1/2, -y+1/2, z-1/2'
 
_cell_length_a                    46.715(6)
_cell_length_b                    9.674(5)
_cell_length_c                    32.798(4)
_cell_angle_alpha                 90.000
_cell_angle_beta                  100.790(5)
_cell_angle_gamma                 90.000
_cell_volume                      14560(8)
_cell_formula_units_Z             8
_cell_measurement_temperature     100(2)
_cell_measurement_reflns_used     ?
_cell_measurement_theta_min       2.2
_cell_measurement_theta_max       28.6
 
_exptl_crystal_description        needle
_exptl_crystal_colour             colorless
_exptl_crystal_size_max           0.21
_exptl_crystal_size_mid           0.19
_exptl_crystal_size_min           0.18
_exptl_crystal_density_meas       ?
_exptl_crystal_density_diffrn     1.169
_exptl_crystal_density_method     'not measured'
_exptl_crystal_F_000              5152
_exptl_absorpt_coefficient_mu     0.642
_exptl_absorpt_correction_type    'empirical'
_exptl_absorpt_correction_T_min   0.8770
_exptl_absorpt_correction_T_max   0.8932
_exptl_absorpt_process_details    'SADABAS 2.10 (Bruker 2003)'
 
_exptl_special_details
;
 ?
;
 
_diffrn_ambient_temperature       100(2)
_diffrn_radiation_wavelength      0.71069
_diffrn_radiation_type            MoK\a
_diffrn_radiation_source          'fine-focus sealed tube'
_diffrn_radiation_monochromator   graphite
_diffrn_measurement_device_type   'Bruker SMART APEX'
_diffrn_measurement_method        /w-scans
_diffrn_detector_area_resol_mean  ?
_diffrn_standards_number          ?
_diffrn_standards_interval_count  ?
_diffrn_standards_interval_time   ?
_diffrn_standards_decay_%         ?
_diffrn_reflns_number             47393
_diffrn_reflns_av_R_equivalents   0.1117
_diffrn_reflns_av_sigmaI/netI     0.2216
_diffrn_reflns_limit_h_min        -57
_diffrn_reflns_limit_h_max        62
_diffrn_reflns_limit_k_min        -12
_diffrn_reflns_limit_k_max        11
_diffrn_reflns_limit_l_min        -43
_diffrn_reflns_limit_l_max        42
_diffrn_reflns_theta_min          2.22
_diffrn_reflns_theta_max          28.59
_reflns_number_total              18329
_reflns_number_gt                 9665
_reflns_threshold_expression      >2sigma(I)
 
_computing_data_collection        'SMART 5.628 (Bruker, 2003)'
_computing_cell_refinement        'SAINT 6.45 ( Bruker, 2003)'
_computing_data_reduction         'SAINT 6.45 ( Bruker, 2003)'
_computing_structure_solution     SIR-97
_computing_structure_refinement   'SHELXL-97 (Sheldrick, 1997)'
_computing_molecular_graphics     'Diamond 2.1e'
_computing_publication_material   ?
 
_refine_special_details
;
 Refinement of F^2^ against ALL reflections.  The weighted R-factor wR and
 goodness of fit S are based on F^2^, conventional R-factors R are based
 on F, with F set to zero for negative F^2^. The threshold expression of
 F^2^ > 2sigma(F^2^) is used only for calculating R-factors(gt) etc. and is
 not relevant to the choice of reflections for refinement.  R-factors based
 on F^2^ are statistically about twice as large as those based on F, and R-
 factors based on ALL data will be even larger.
;
 
_refine_ls_structure_factor_coef  Fsqd
_refine_ls_matrix_type            full
_refine_ls_weighting_scheme       calc
_refine_ls_weighting_details
 'calc w=1/[\s^2^(Fo^2^)+(0.0766P)^2^+0.0000P] where P=(Fo^2^+2Fc^2^)/3'
_atom_sites_solution_primary      direct
_atom_sites_solution_secondary    difmap
_atom_sites_solution_hydrogens    geom
_refine_ls_hydrogen_treatment     constr
_refine_ls_extinction_method      none
_refine_ls_extinction_coef        ?
_refine_ls_number_reflns          18329
_refine_ls_number_parameters      721
_refine_ls_number_restraints      0
_refine_ls_R_factor_all           0.1672
_refine_ls_R_factor_gt            0.0701
_refine_ls_wR_factor_ref          0.1843
_refine_ls_wR_factor_gt           0.1564
_refine_ls_goodness_of_fit_ref    0.803
_refine_ls_restrained_S_all       0.803
_refine_ls_shift/su_max           0.003
_refine_ls_shift/su_mean          0.000
 
loop_
 _atom_site_label
 _atom_site_type_symbol
 _atom_site_fract_x
 _atom_site_fract_y
 _atom_site_fract_z
 _atom_site_U_iso_or_equiv
 _atom_site_adp_type
 _atom_site_occupancy
 _atom_site_symmetry_multiplicity
 _atom_site_calc_flag
 _atom_site_refinement_flags
 _atom_site_disorder_assembly
 _atom_site_disorder_group
Cd1 Cd 0.242018(10) -0.17821(5) -0.134890(12) 0.03856(14) Uani 1 1 d . . .
Cd2 Cd 0.601321(11) 0.53899(5) 0.042694(15) 0.04609(16) Uani 1 1 d . . .
O5 O 0.28509(9) -0.0409(4) -0.10692(11) 0.0402(10) Uani 1 1 d . . .
O3 O 0.23921(11) -0.0343(5) -0.19979(12) 0.0560(13) Uani 1 1 d . . .
O1 O 0.24393(10) -0.7285(5) -0.57063(12) 0.0507(12) Uani 1 1 d . . .
O6 O 0.29002(10) -0.2358(5) -0.13859(13) 0.0536(12) Uani 1 1 d . . .
O9 O 0.58754(11) 0.6882(5) 0.09443(14) 0.0589(13) Uani 1 1 d . . .
O4 O 0.22410(10) -0.2501(5) -0.20008(12) 0.0508(12) Uani 1 1 d . . .
N2 N 0.21060(10) -0.1727(5) -0.39412(13) 0.0355(12) Uani 1 1 d . . .
N1 N 0.21145(10) -0.2515(5) -0.45547(13) 0.0344(12) Uani 1 1 d . . .
O10 O 0.62575(10) 0.5529(5) 0.10994(13) 0.0567(13) Uani 1 1 d . . .
O'1 O 0.64159(10) 0.4145(5) 0.02955(14) 0.0463(13) Uani 1 1 d . . .
C5 C 0.21931(13) -0.3356(6) -0.48822(16) 0.0341(14) Uani 1 1 d . . .
C8 C 0.18820(13) -0.1565(6) -0.45977(17) 0.0380(15) Uani 1 1 d . . .
H8 H 0.1756 -0.1316 -0.4841 0.046 Uiso 1 1 calc R . .
C11 C 0.21579(13) -0.1628(6) -0.34972(17) 0.0359(14) Uani 1 1 d . . .
N3 N 0.42296(13) -0.0581(6) -0.0926(2) 0.0496(17) Uani 1 1 d . . .
N4 N 0.46619(13) 0.0263(7) -0.0704(2) 0.0507(19) Uani 1 1 d . . .
C10 C 0.22438(14) -0.2582(6) -0.41557(16) 0.0351(14) Uani 1 1 d . . .
H10 H 0.2403 -0.3134 -0.4047 0.042 Uiso 1 1 calc R . .
N6 N 0.63564(13) 0.9899(7) 0.33808(16) 0.0476(17) Uani 1 1 d . . .
N23 C 0.30072(15) -0.1325(7) -0.11958(18) 0.0425(16) Uani 1 1 d . . .
C19 C 0.33283(13) -0.1166(7) -0.1108(2) 0.0429(16) Uani 1 1 d . . .
C9 C 0.18805(14) -0.1103(6) -0.42198(18) 0.0410(15) Uani 1 1 d . . .
H9 H 0.1750 -0.0461 -0.4150 0.049 Uiso 1 1 calc R . .
C2 C 0.23165(13) -0.5107(6) -0.54915(17) 0.0353(14) Uani 1 1 d . . .
C6 C 0.21128(13) -0.2934(6) -0.52965(16) 0.0372(15) Uani 1 1 d . . .
H6 H 0.2020 -0.2093 -0.5367 0.045 Uiso 1 1 calc R . .
N7 N 0.66186(14) 0.2357(7) 0.0020(2) 0.050(2) Uani 1 1 d . . .
C34 C 0.55588(17) 0.3657(9) 0.0132(3) 0.046(2) Uani 1 1 d . . .
C18 C 0.22975(15) -0.1410(8) -0.21838(19) 0.0483(18) Uani 1 1 d . . .
C15 C 0.22483(13) -0.1491(7) -0.26460(18) 0.0422(16) Uani 1 1 d . . .
C17 C 0.21611(13) -0.0345(7) -0.33126(19) 0.0445(16) Uani 1 1 d . . .
H17 H 0.2131 0.0460 -0.3470 0.053 Uiso 1 1 calc R . .
C35 C 0.60979(16) 0.6448(7) 0.1195(2) 0.0468(17) Uani 1 1 d . . .
O7 O 0.55232(14) 0.4859(7) 0.0180(3) 0.060(3) Uani 1 1 d . . .
C4 C 0.23386(13) -0.4585(6) -0.47685(18) 0.0389(15) Uani 1 1 d . . .
H4 H 0.2394 -0.4831 -0.4491 0.047 Uiso 1 1 calc R . .
C14 C 0.22489(14) -0.2746(6) -0.28356(17) 0.0426(16) Uani 1 1 d . . .
H14 H 0.2279 -0.3546 -0.2676 0.051 Uiso 1 1 calc R . .
N5 N 0.63797(13) 0.8842(7) 0.28134(17) 0.0506(18) Uani 1 1 d . . .
C13 C 0.22046(14) -0.2835(7) -0.32666(18) 0.0398(17) Uani 1 1 d . . .
H13 H 0.2206 -0.3687 -0.3397 0.046 Uiso 1 1 calc R . .
C44 C 0.62002(17) 0.9473(8) 0.3024(2) 0.045(2) Uani 1 1 d . . .
H44 H 0.6001 0.9594 0.2935 0.059 Uiso 1 1 calc R . .
C39 C 0.63021(17) 0.8238(8) 0.2401(2) 0.0578(19) Uani 1 1 d . . .
C16 C 0.22117(14) -0.0309(7) -0.28833(18) 0.0463(17) Uani 1 1 d . . .
H16 H 0.2221 0.0543 -0.2750 0.056 Uiso 1 1 calc R . .
C24 C 0.34544(15) 0.0054(7) -0.0927(2) 0.0413(19) Uani 1 1 d . . .
H24 H 0.3337 0.0749 -0.0851 0.064 Uiso 1 1 calc R . .
C3 C 0.23990(13) -0.5436(6) -0.50807(17) 0.0365(14) Uani 1 1 d . . .
H3 H 0.2499 -0.6258 -0.5009 0.044 Uiso 1 1 calc R . .
C7 C 0.21776(13) -0.3820(7) -0.55935(17) 0.0359(16) Uani 1 1 d . . .
H7 H 0.2129 -0.3565 -0.5871 0.051 Uiso 1 1 calc R . .
C'1 C 0.64080(16) 0.2953(7) 0.0166(2) 0.0462(19) Uani 1 1 d . . .
H'1 H 0.6241 0.2438 0.0172 0.057 Uiso 1 1 calc R . .
C23 C 0.37468(16) 0.0218(6) -0.0861(2) 0.0498(19) Uani 1 1 d . . .
H23 H 0.3829 0.1023 -0.0735 0.067 Uiso 1 1 calc R . .
C27 C 0.43822(15) 0.0292(7) -0.0645(2) 0.047(2) Uani 1 1 d . . .
H27 H 0.4310 0.0814 -0.0449 0.061 Uiso 1 1 calc R . .
C1 C 0.23524(14) -0.6092(7) -0.58154(18) 0.0400(15) Uani 1 1 d . . .
C26 C 0.46847(18) -0.0649(10) -0.1024(3) 0.051(3) Uani 1 1 d . . .
H26 H 0.4854 -0.0855 -0.1121 0.081 Uiso 1 1 calc R . .
C20 C 0.35085(14) -0.2155(6) -0.1224(2) 0.0448(17) Uani 1 1 d . . .
H20 H 0.3426 -0.2953 -0.1355 0.054 Uiso 1 1 calc R . .
C31 C 0.53307(15) 0.2721(8) -0.0060(2) 0.0465(19) Uani 1 1 d . . .
C21 C 0.38035(16) -0.2008(7) -0.1154(2) 0.0459(18) Uani 1 1 d . . .
H21 H 0.3922 -0.2708 -0.1224 0.062 Uiso 1 1 calc R . .
C22 C 0.39235(14) -0.0786(7) -0.0976(2) 0.0386(19) Uani 1 1 d . . .
C28 C 0.48965(16) 0.1075(8) -0.0473(2) 0.048(2) Uani 1 1 d . . .
C40 C 0.60514(18) 0.8661(9) 0.2133(2) 0.062(3) Uani 1 1 d . . .
H40 H 0.5931 0.9339 0.2211 0.084 Uiso 1 1 calc R . .
C38 C 0.64776(17) 0.7243(10) 0.2292(2) 0.058(3) Uani 1 1 d . . .
H38 H 0.6645 0.6975 0.2476 0.093 Uiso 1 1 calc R . .
C'3 C 0.65754(19) 0.0913(9) -0.0128(3) 0.062(4) Uani 1 1 d . . .
H'3A H 0.6742 0.0616 -0.0236 0.085 Uiso 1 1 calc R . .
H'3B H 0.6405 0.0860 -0.0342 0.085 Uiso 1 1 calc R . .
H'3C H 0.6551 0.0326 0.0099 0.085 Uiso 1 1 calc R . .
C42 C 0.66651(17) 0.8883(9) 0.3052(2) 0.047(2) Uani 1 1 d . . .
H42 H 0.6833 0.8516 0.2981 0.083 Uiso 1 1 calc R . .
C36 C 0.61651(16) 0.7044(8) 0.1625(2) 0.0547(19) Uani 1 1 d . . .
C'2 C 0.6895(2) 0.2990(10) 0.0027(4) 0.055(6) Uani 1 1 d . . .
H'2A H 0.7012 0.2407 -0.0114 0.093 Uiso 1 1 calc R . .
H'2B H 0.6992 0.3116 0.0310 0.093 Uiso 1 1 calc R . .
H'2C H 0.6868 0.3871 -0.0109 0.093 Uiso 1 1 calc R . .
C43 C 0.66426(17) 0.9557(9) 0.3399(2) 0.053(2) Uani 1 1 d . . .
H43 H 0.6795 0.9760 0.3616 0.084 Uiso 1 1 calc R . .
C29 C 0.51736(17) 0.0642(10) -0.0431(3) 0.059(4) Uani 1 1 d . . .
H29 H 0.5216 -0.0209 -0.0538 0.123 Uiso 1 1 calc R . .
C41 C 0.59880(18) 0.8052(8) 0.1754(2) 0.058(2) Uani 1 1 d . . .
H41 H 0.5819 0.8319 0.1572 0.086 Uiso 1 1 calc R . .
C30 C 0.53951(18) 0.1487(9) -0.0226(3) 0.052(3) Uani 1 1 d . . .
H30 H 0.5588 0.1212 -0.0202 0.104 Uiso 1 1 calc R . .
C33 C 0.48196(18) 0.2263(10) -0.0296(3) 0.053(4) Uani 1 1 d . . .
H33 H 0.4626 0.2517 -0.0315 0.129 Uiso 1 1 calc R . .
C37 C 0.64066(18) 0.6627(9) 0.1903(2) 0.064(2) Uani 1 1 d . . .
H37 H 0.6524 0.5926 0.1831 0.085 Uiso 1 1 calc R . .
C25 C 0.44172(19) -0.1188(10) -0.1170(3) 0.050(4) Uani 1 1 d . . .
H25 H 0.4367 -0.1821 -0.1385 0.132 Uiso 1 1 calc R . .
C32 C 0.50505(19) 0.3093(10) -0.0081(3) 0.050(4) Uani 1 1 d . . .
H32 H 0.5008 0.3904 0.0048 0.128 Uiso 1 1 calc R . .
O2 O 0.22893(9) -0.5755(4) -0.61918(12) 0.0489(12) Uani 1 1 d . . .
O8 O 0.57973(14) 0.3195(6) 0.0299(2) 0.049(2) Uani 1 1 d . . .
C45 C 0.62477(16) 1.0554(8) 0.3719(2) 0.0542(19) Uani 1 1 d . . .
C48 C 0.64055(16) 1.1592(9) 0.3927(2) 0.056(2) Uani 1 1 d . . .
H48 H 0.6570 1.1920 0.3837 0.079 Uiso 1 1 calc R . .
C46 C 0.59972(16) 1.0083(8) 0.3841(2) 0.062(2) Uani 1 1 d . . .
H46 H 0.5887 0.9387 0.3691 0.074 Uiso 1 1 calc R . .
C47 C 0.59093(16) 1.0649(8) 0.4187(2) 0.053(2) Uani 1 1 d . . .
H47 H 0.5741 1.0332 0.4271 0.076 Uiso 1 1 calc R . .
C50 C 0.60732(14) 1.1680(7) 0.44051(18) 0.0466(17) Uani 1 1 d . . .
C51 C 0.59879(17) 1.2232(7) 0.48014(19) 0.0481(18) Uani 1 1 d . . .
C49 C 0.63216(17) 1.2164(8) 0.4272(2) 0.059(2) Uani 1 1 d . . .
H49 H 0.6431 1.2874 0.4416 0.079 Uiso 1 1 calc R . .
O11 O 0.61459(11) 1.3238(5) 0.49625(13) 0.0462(14) Uani 1 1 d . . .
O12 O 0.57841(11) 1.1735(6) 0.49269(14) 0.0514(15) Uani 1 1 d . . .
O14 O 0.18972(15) -0.1266(10) -0.1259(2) 0.048(3) Uani 1 1 d . . .
O15 O 0.22045(13) 0.0264(6) -0.11242(15) 0.0643(14) Uani 1 1 d . . .
N8 N 0.1939(4) 0.0068(13) -0.1103(3) 0.053(5) Uani 1 1 d . . .
O16 O 0.1755(3) 0.030(2) -0.0811(7) 0.050(5) Uani 1 1 d . . .
 
loop_
 _atom_site_aniso_label
 _atom_site_aniso_U_11
 _atom_site_aniso_U_22
 _atom_site_aniso_U_33
 _atom_site_aniso_U_23
 _atom_site_aniso_U_13
 _atom_site_aniso_U_12
Cd1 0.0533(3) 0.0331(3) 0.0306(2) -0.0032(2) 0.0112(2) -0.0073(2)
Cd2 0.0503(3) 0.0417(3) 0.0487(3) -0.0058(2) 0.0156(2) -0.0020(2)
O5 0.055(3) 0.025(2) 0.041(2) 0.002(2) 0.010(2) -0.009(2)
O3 0.088(4) 0.041(3) 0.037(2) -0.011(2) 0.008(2) -0.017(3)
O1 0.069(3) 0.042(3) 0.042(2) -0.004(2) 0.011(2) 0.010(2)
O6 0.063(3) 0.037(3) 0.063(3) -0.020(2) 0.017(2) -0.016(2)
O9 0.068(4) 0.054(3) 0.055(3) -0.009(3) 0.011(3) 0.000(3)
O4 0.067(3) 0.048(3) 0.037(2) 0.001(2) 0.008(2) -0.016(2)
N2 0.047(3) 0.029(3) 0.033(3) 0.002(2) 0.013(2) 0.003(2)
N1 0.048(3) 0.029(3) 0.024(2) 0.004(2) 0.002(2) 0.003(2)
O10 0.059(3) 0.055(3) 0.059(3) -0.004(2) 0.018(2) 0.013(3)
O'1 0.062(3) 0.034(3) 0.046(3) -0.013(3) 0.015(3) -0.006(2)
C5 0.049(4) 0.023(3) 0.031(3) -0.009(3) 0.011(3) -0.001(3)
C8 0.052(4) 0.027(4) 0.033(3) 0.007(3) 0.004(3) 0.015(3)
C11 0.042(4) 0.034(4) 0.033(3) 0.002(3) 0.011(3) 0.003(3)
N3 0.061(4) 0.038(4) 0.054(5) -0.010(3) 0.011(4) -0.004(3)
N4 0.047(4) 0.057(4) 0.053(5) -0.015(4) 0.014(4) -0.008(3)
C10 0.056(4) 0.024(3) 0.029(3) 0.002(3) 0.018(3) 0.003(3)
N6 0.059(4) 0.044(5) 0.041(3) -0.011(3) 0.007(3) 0.009(3)
N23 0.052(5) 0.035(4) 0.040(4) -0.003(3) 0.007(3) -0.013(3)
C19 0.035(4) 0.034(4) 0.062(4) -0.014(3) 0.015(3) -0.009(3)
C9 0.048(4) 0.030(4) 0.042(4) 0.008(3) 0.001(3) 0.009(3)
C2 0.036(4) 0.039(4) 0.033(3) 0.007(3) 0.011(3) -0.003(3)
C6 0.045(4) 0.034(4) 0.031(3) 0.005(3) 0.006(3) 0.000(3)
N7 0.054(4) 0.053(4) 0.046(5) -0.017(4) 0.014(4) 0.004(3)
C34 0.043(5) 0.054(6) 0.043(5) -0.023(5) 0.011(4) 0.013(4)
C18 0.057(5) 0.051(5) 0.038(4) 0.001(3) 0.014(3) -0.005(4)
C15 0.047(4) 0.040(4) 0.040(3) 0.000(3) 0.012(3) -0.011(3)
C17 0.051(4) 0.037(4) 0.044(4) 0.001(3) 0.006(3) 0.010(3)
C35 0.047(5) 0.045(5) 0.050(4) -0.001(3) 0.010(4) -0.003(3)
O7 0.077(5) 0.047(5) 0.054(5) -0.014(5) 0.004(5) -0.004(4)
C4 0.051(4) 0.030(4) 0.038(3) 0.008(3) 0.014(3) -0.001(3)
C14 0.061(5) 0.030(4) 0.036(3) 0.003(3) 0.005(3) 0.003(3)
N5 0.043(4) 0.057(5) 0.055(4) -0.010(4) 0.011(3) 0.001(3)
C13 0.057(5) 0.030(4) 0.033(3) -0.006(3) 0.010(3) 0.003(3)
C44 0.060(5) 0.041(4) 0.037(4) -0.010(4) 0.015(4) 0.009(4)
C39 0.065(5) 0.066(5) 0.044(4) -0.007(4) 0.016(4) 0.010(4)
C16 0.066(5) 0.030(4) 0.042(4) -0.011(3) 0.008(3) -0.004(3)
C24 0.050(5) 0.036(4) 0.040(5) -0.012(4) 0.017(4) -0.009(3)
C3 0.044(4) 0.022(3) 0.043(3) 0.004(3) 0.007(3) 0.004(3)
C7 0.051(4) 0.039(5) 0.021(3) 0.008(3) 0.014(3) -0.004(4)
C'1 0.053(5) 0.038(5) 0.048(5) -0.011(4) 0.012(4) -0.009(4)
C23 0.060(5) 0.039(4) 0.054(5) -0.011(4) 0.018(4) -0.007(3)
C27 0.050(5) 0.045(5) 0.049(5) -0.009(4) 0.019(4) -0.004(4)
C1 0.059(5) 0.033(4) 0.033(3) 0.001(3) 0.021(3) 0.008(3)
C26 0.054(4) 0.064(4) 0.035(5) -0.014(4) 0.012(5) -0.003(4)
C20 0.043(4) 0.031(4) 0.063(4) -0.013(3) 0.017(3) -0.009(3)
C31 0.036(4) 0.048(4) 0.048(5) -0.009(4) -0.008(4) -0.002(3)
C21 0.065(5) 0.028(4) 0.047(4) -0.012(3) 0.013(4) 0.000(3)
C22 0.035(4) 0.044(5) 0.042(5) -0.018(4) 0.020(4) -0.009(3)
C28 0.051(5) 0.052(5) 0.042(4) -0.015(5) 0.010(5) -0.005(4)
C40 0.079(4) 0.046(4) 0.057(5) -0.019(5) 0.002(4) 0.010(5)
C38 0.067(5) 0.058(5) 0.047(4) -0.014(5) 0.007(4) 0.008(4)
C'3 0.071(4) 0.061(5) 0.046(4) -0.018(4) -0.009(5) 0.010(4)
C42 0.059(6) 0.045(5) 0.039(5) -0.012(4) 0.016(4) -0.010(4)
C36 0.057(5) 0.069(6) 0.040(4) -0.004(4) 0.015(4) 0.010(4)
C'2 0.063(4) 0.056(5) 0.049(5) -0.013(4) 0.015(4) -0.010(4)
C43 0.056(5) 0.045(5) 0.056(5) -0.020(5) 0.006(4) 0.009(5)
C29 0.067(5) 0.054(5) 0.057(4) -0.021(5) 0.012(5) -0.007(5)
C41 0.061(4) 0.059(5) 0.051(4) -0.016(4) 0.005(4) 0.008(5)
C30 0.052(5) 0.065(5) 0.043(4) -0.014(5) 0.018(5) 0.006(4)
C33 0.050(6) 0.061(5) 0.049(6) -0.013(5) 0.014(5) -0.005(5)
C37 0.084(6) 0.062(5) 0.049(4) -0.011(4) 0.020(4) 0.007(5)
C25 0.066(5) 0.045(5) 0.040(5) -0.018(5) 0.016(5) -0.009(5)
C32 0.053(5) 0.041(5) 0.060(4) -0.013(5) 0.024(6) -0.008(5)
O2 0.069(3) 0.041(3) 0.037(2) -0.006(2) 0.013(2) 0.007(2)
O8 0.062(4) 0.047(5) 0.039(7) -0.010(5) 0.012(5) -0.006(4)
C45 0.054(5) 0.065(5) 0.045(4) -0.012(4) 0.013(4) -0.007(4)
C48 0.057(5) 0.066(5) 0.050(4) -0.014(4) 0.020(4) -0.009(5)
C46 0.057(5) 0.066(5) 0.061(5) -0.026(4) 0.010(4) -0.009(4)
C47 0.062(5) 0.045(6) 0.053(4) -0.009(4) 0.010(4) -0.008(4)
C50 0.048(4) 0.052(5) 0.039(3) -0.003(3) 0.007(3) -0.005(4)
C51 0.068(5) 0.042(5) 0.034(3) -0.002(3) 0.009(4) 0.018(4)
C49 0.072(6) 0.066(6) 0.041(4) -0.015(4) 0.017(4) -0.010(5)
O11 0.060(4) 0.046(4) 0.035(3) -0.011(3) 0.020(3) -0.011(3)
O12 0.061(4) 0.052(4) 0.043(3) -0.004(3) 0.014(3) -0.008(3)
O14 0.066(5) 0.042(4) 0.039(5) -0.010(5) 0.015(5) -0.005(5)
O15 0.087(4) 0.052(3) 0.054(3) -0.004(3) 0.012(3) 0.000(3)
N8 0.065(2) 0.045(10) 0.039(7) 0.012(5) -0.012(4) -0.006(5)
O16 0.063(4) 0.035(2) 0.045(3) -0.014(3) -0.008(4) 0.008(4)
 
_geom_special_details
;
 All esds (except the esd in the dihedral angle between two l.s. planes)
 are estimated using the full covariance matrix.  The cell esds are taken
 into account individually in the estimation of esds in distances, angles
 and torsion angles; correlations between esds in cell parameters are only
 used when they are defined by crystal symmetry.  An approximate (isotropic)
 treatment of cell esds is used for estimating esds involving l.s. planes.
;
 
loop_
 _geom_bond_atom_site_label_1
 _geom_bond_atom_site_label_2
 _geom_bond_distance
 _geom_bond_site_symmetry_2
 _geom_bond_publ_flag
Cd1 O4 2.255(4) . ?
Cd1 O1 2.279(4) 6_546 ?
Cd1 O6 2.335(4) . ?
Cd1 O15 2.399(5) . ?
Cd1 O5 2.442(4) . ?
Cd1 O3 2.526(4) . ?
Cd1 O2 2.537(4) 6_546 ?
Cd1 O14 2.565(7) . ?
Cd1 C18 2.715(6) . ?
Cd1 N23 2.730(7) . ?
Cd1 C1 2.757(6) 6_546 ?
Cd2 O11 2.195(5) 6_575 ?
Cd2 O10 2.290(4) . ?
Cd2 O7 2.338(6) . ?
Cd2 O'1 2.340(5) . ?
Cd2 O8 2.355(6) . ?
Cd2 O9 2.405(4) . ?
Cd2 C35 2.680(7) . ?
Cd2 C34 2.736(8) . ?
O5 N23 1.267(7) . ?
O3 C18 1.238(7) . ?
O1 C1 1.253(7) . ?
O1 Cd1 2.279(4) 6_545 ?
O6 N23 1.233(7) . ?
O9 C35 1.270(8) . ?
O4 C18 1.266(7) . ?
N2 C10 1.328(7) . ?
N2 C9 1.396(7) . ?
N2 C11 1.434(7) . ?
N1 C10 1.336(7) . ?
N1 C8 1.410(7) . ?
N1 C5 1.448(7) . ?
O10 C35 1.238(7) . ?
O'1 C'1 1.228(7) . ?
C5 C4 1.386(8) . ?
C5 C6 1.401(7) . ?
C8 C9 1.319(8) . ?
C8 H8 0.9300 . ?
C11 C17 1.380(8) . ?
C11 C13 1.386(8) . ?
N3 C27 1.350(8) . ?
N3 C25 1.420(9) . ?
N3 C22 1.422(8) . ?
N4 C27 1.356(8) . ?
N4 C26 1.390(9) . ?
N4 C28 1.443(9) . ?
C10 H10 0.9300 . ?
N6 C44 1.325(8) . ?
N6 C43 1.368(8) . ?
N6 C45 1.449(8) . ?
N23 C19 1.481(8) . ?
C19 C20 1.374(8) . ?
C19 C24 1.401(8) . ?
C9 H9 0.9300 . ?
C2 C3 1.368(8) . ?
C2 C7 1.415(8) . ?
C2 C1 1.460(8) . ?
C6 C7 1.373(8) . ?
C6 H6 0.9300 . ?
N7 C'1 1.306(8) . ?
N7 C'2 1.426(10) . ?
N7 C'3 1.480(10) . ?
C34 O7 1.190(9) . ?
C34 O8 1.229(8) . ?
C34 C31 1.450(10) . ?
C18 C15 1.492(8) . ?
C15 C14 1.364(8) . ?
C15 C16 1.376(8) . ?
C17 C16 1.384(8) . ?
C17 H17 0.9300 . ?
C35 C36 1.502(9) . ?
C4 C3 1.383(8) . ?
C4 H4 0.9300 . ?
C14 C13 1.393(8) . ?
C14 H14 0.9300 . ?
N5 C44 1.330(8) . ?
N5 C42 1.414(9) . ?
N5 C39 1.456(8) . ?
C13 H13 0.9300 . ?
C44 H44 0.9300 . ?
C39 C38 1.355(10) . ?
C39 C40 1.387(10) . ?
C16 H16 0.9300 . ?
C24 C23 1.352(9) . ?
C24 H24 0.9300 . ?
C3 H3 0.9300 . ?
C7 H7 0.9300 . ?
C'1 H'1 0.9300 . ?
C23 C22 1.373(9) . ?
C23 H23 0.9300 . ?
C27 H27 0.9300 . ?
C1 O2 1.258(6) . ?
C1 Cd1 2.757(6) 6_545 ?
C26 C25 1.356(10) . ?
C26 H26 0.9300 . ?
C20 C21 1.362(8) . ?
C20 H20 0.9300 . ?
C31 C32 1.347(10) . ?
C31 C30 1.368(10) . ?
C21 C22 1.389(9) . ?
C21 H21 0.9300 . ?
C28 C29 1.343(10) . ?
C28 C33 1.365(10) . ?
C40 C41 1.359(9) . ?
C40 H40 0.9300 . ?
C38 C37 1.390(10) . ?
C38 H38 0.9300 . ?
C'3 H'3A 0.9600 . ?
C'3 H'3B 0.9600 . ?
C'3 H'3C 0.9600 . ?
C42 C43 1.333(9) . ?
C42 H42 0.9300 . ?
C36 C37 1.370(9) . ?
C36 C41 1.395(9) . ?
C'2 H'2A 0.9600 . ?
C'2 H'2B 0.9600 . ?
C'2 H'2C 0.9600 . ?
C43 H43 0.9300 . ?
C29 C30 1.389(10) . ?
C29 H29 0.9300 . ?
C41 H41 0.9300 . ?
C30 H30 0.9300 . ?
C33 C32 1.422(11) . ?
C33 H33 0.9300 . ?
C37 H37 0.9300 . ?
C25 H25 0.9300 . ?
C32 H32 0.9300 . ?
O2 Cd1 2.537(4) 6_545 ?
C45 C48 1.352(9) . ?
C45 C46 1.382(9) . ?
C48 C49 1.381(9) . ?
C48 H48 0.9300 . ?
C46 C47 1.391(9) . ?
C46 H46 0.9300 . ?
C47 C50 1.374(9) . ?
C47 H47 0.9300 . ?
C50 C49 1.395(9) . ?
C50 C51 1.525(8) . ?
C51 O12 1.206(8) . ?
C51 O11 1.275(8) . ?
C49 H49 0.9300 . ?
O11 Cd2 2.195(5) 6_576 ?
O14 N8 1.387(14) . ?
O15 N8 1.271(17) . ?
N8 O16 1.42(2) . ?
 
loop_
 _geom_angle_atom_site_label_1
 _geom_angle_atom_site_label_2
 _geom_angle_atom_site_label_3
 _geom_angle
 _geom_angle_site_symmetry_1
 _geom_angle_site_symmetry_3
 _geom_angle_publ_flag
O4 Cd1 O1 134.26(16) . 6_546 ?
O4 Cd1 O6 93.83(16) . . ?
O1 Cd1 O6 94.69(16) 6_546 . ?
O4 Cd1 O15 116.30(17) . . ?
O1 Cd1 O15 89.36(17) 6_546 . ?
O6 Cd1 O15 132.47(18) . . ?
O4 Cd1 O5 131.10(14) . . ?
O1 Cd1 O5 88.92(14) 6_546 . ?
O6 Cd1 O5 54.38(14) . . ?
O15 Cd1 O5 78.44(18) . . ?
O4 Cd1 O3 54.52(15) . . ?
O1 Cd1 O3 169.85(15) 6_546 . ?
O6 Cd1 O3 89.22(16) . . ?
O15 Cd1 O3 81.12(16) . . ?
O5 Cd1 O3 85.75(14) . . ?
O4 Cd1 O2 80.91(15) . 6_546 ?
O1 Cd1 O2 53.80(14) 6_546 6_546 ?
O6 Cd1 O2 93.27(15) . 6_546 ?
O15 Cd1 O2 125.56(17) . 6_546 ?
O5 Cd1 O2 130.36(14) . 6_546 ?
O3 Cd1 O2 135.42(14) . 6_546 ?
O4 Cd1 O14 88.7(2) . . ?
O1 Cd1 O14 81.0(2) 6_546 . ?
O6 Cd1 O14 175.6(2) . . ?
O15 Cd1 O14 48.7(2) . . ?
O5 Cd1 O14 125.9(2) . . ?
O3 Cd1 O14 95.1(2) . . ?
O2 Cd1 O14 83.6(2) 6_546 . ?
O4 Cd1 C18 27.58(17) . . ?
O1 Cd1 C18 161.74(19) 6_546 . ?
O6 Cd1 C18 90.15(18) . . ?
O15 Cd1 C18 100.31(19) . . ?
O5 Cd1 C18 108.09(17) . . ?
O3 Cd1 C18 27.02(16) . . ?
O2 Cd1 C18 108.42(18) 6_546 . ?
O14 Cd1 C18 93.7(2) . . ?
O4 Cd1 N23 113.96(17) . . ?
O1 Cd1 N23 91.71(17) 6_546 . ?
O6 Cd1 N23 26.75(16) . . ?
O15 Cd1 N23 106.0(2) . . ?
O5 Cd1 N23 27.64(15) . . ?
O3 Cd1 N23 87.57(17) . . ?
O2 Cd1 N23 112.76(17) 6_546 . ?
O14 Cd1 N23 153.3(2) . . ?
C18 Cd1 N23 100.33(19) . . ?
O4 Cd1 C1 107.78(18) . 6_546 ?
O1 Cd1 C1 26.72(15) 6_546 6_546 ?
O6 Cd1 C1 94.63(17) . 6_546 ?
O15 Cd1 C1 108.41(18) . 6_546 ?
O5 Cd1 C1 110.60(16) . 6_546 ?
O3 Cd1 C1 162.17(17) . 6_546 ?
O2 Cd1 C1 27.08(15) 6_546 6_546 ?
O14 Cd1 C1 81.2(2) . 6_546 ?
C18 Cd1 C1 135.4(2) . 6_546 ?
N23 Cd1 C1 103.58(19) . 6_546 ?
O11 Cd2 O10 118.57(18) 6_575 . ?
O11 Cd2 O7 106.1(3) 6_575 . ?
O10 Cd2 O7 128.7(3) . . ?
O11 Cd2 O'1 80.91(18) 6_575 . ?
O10 Cd2 O'1 86.27(16) . . ?
O7 Cd2 O'1 126.3(2) . . ?
O11 Cd2 O8 126.0(2) 6_575 . ?
O10 Cd2 O8 110.2(2) . . ?
O7 Cd2 O8 51.8(2) . . ?
O'1 Cd2 O8 80.5(2) . . ?
O11 Cd2 O9 105.93(17) 6_575 . ?
O10 Cd2 O9 55.67(16) . . ?
O7 Cd2 O9 90.1(2) . . ?
O'1 Cd2 O9 140.27(16) . . ?
O8 Cd2 O9 120.3(2) . . ?
O11 Cd2 C35 114.24(19) 6_575 . ?
O10 Cd2 C35 27.43(17) . . ?
O7 Cd2 C35 111.9(3) . . ?
O'1 Cd2 C35 112.8(2) . . ?
O8 Cd2 C35 119.7(2) . . ?
O9 Cd2 C35 28.28(17) . . ?
O11 Cd2 C34 115.3(2) 6_575 . ?
O10 Cd2 C34 126.2(2) . . ?
O7 Cd2 C34 25.6(2) . . ?
O'1 Cd2 C34 102.5(2) . . ?
O8 Cd2 C34 26.6(2) . . ?
O9 Cd2 C34 108.9(2) . . ?
C35 Cd2 C34 122.3(2) . . ?
N23 O5 Cd1 88.9(4) . . ?
C18 O3 Cd1 85.0(4) . . ?
C1 O1 Cd1 98.4(4) . 6_545 ?
N23 O6 Cd1 94.8(4) . . ?
C35 O9 Cd2 88.0(4) . . ?
C18 O4 Cd1 96.8(4) . . ?
C10 N2 C9 107.7(5) . . ?
C10 N2 C11 124.9(5) . . ?
C9 N2 C11 126.8(5) . . ?
C10 N1 C8 109.1(5) . . ?
C10 N1 C5 124.6(5) . . ?
C8 N1 C5 126.1(4) . . ?
C35 O10 Cd2 94.1(4) . . ?
C'1 O'1 Cd2 125.0(4) . . ?
C4 C5 C6 122.7(5) . . ?
C4 C5 N1 117.5(5) . . ?
C6 C5 N1 119.8(5) . . ?
C9 C8 N1 105.5(5) . . ?
C9 C8 H8 127.3 . . ?
N1 C8 H8 127.3 . . ?
C17 C11 C13 122.1(5) . . ?
C17 C11 N2 119.4(5) . . ?
C13 C11 N2 118.5(5) . . ?
C27 N3 C25 109.9(6) . . ?
C27 N3 C22 123.9(6) . . ?
C25 N3 C22 126.1(6) . . ?
C27 N4 C26 109.4(6) . . ?
C27 N4 C28 124.8(6) . . ?
C26 N4 C28 125.8(6) . . ?
N2 C10 N1 108.3(5) . . ?
N2 C10 H10 125.9 . . ?
N1 C10 H10 125.9 . . ?
C44 N6 C43 109.5(6) . . ?
C44 N6 C45 126.8(6) . . ?
C43 N6 C45 123.5(6) . . ?
O6 N23 O5 121.9(6) . . ?
O6 N23 C19 118.8(6) . . ?
O5 N23 C19 119.3(6) . . ?
O6 N23 Cd1 58.5(3) . . ?
O5 N23 Cd1 63.4(3) . . ?
C19 N23 Cd1 176.6(5) . . ?
C20 C19 C24 118.2(6) . . ?
C20 C19 N23 121.7(6) . . ?
C24 C19 N23 120.0(6) . . ?
C8 C9 N2 109.4(5) . . ?
C8 C9 H9 125.3 . . ?
N2 C9 H9 125.3 . . ?
C3 C2 C7 118.0(5) . . ?
C3 C2 C1 121.0(6) . . ?
C7 C2 C1 120.8(5) . . ?
C7 C6 C5 116.8(5) . . ?
C7 C6 H6 121.6 . . ?
C5 C6 H6 121.6 . . ?
C'1 N7 C'2 123.2(6) . . ?
C'1 N7 C'3 118.0(7) . . ?
C'2 N7 C'3 118.6(6) . . ?
O7 C34 O8 115.7(8) . . ?
O7 C34 C31 124.0(8) . . ?
O8 C34 C31 119.8(8) . . ?
O7 C34 Cd2 58.2(5) . . ?
O8 C34 Cd2 59.1(4) . . ?
C31 C34 Cd2 174.3(6) . . ?
O3 C18 O4 123.3(6) . . ?
O3 C18 C15 121.1(6) . . ?
O4 C18 C15 115.6(6) . . ?
O3 C18 Cd1 68.0(3) . . ?
O4 C18 Cd1 55.6(3) . . ?
C15 C18 Cd1 168.9(5) . . ?
C14 C15 C16 119.5(6) . . ?
C14 C15 C18 119.8(6) . . ?
C16 C15 C18 120.7(6) . . ?
C11 C17 C16 117.0(6) . . ?
C11 C17 H17 121.5 . . ?
C16 C17 H17 121.5 . . ?
O10 C35 O9 122.1(6) . . ?
O10 C35 C36 119.0(7) . . ?
O9 C35 C36 118.9(6) . . ?
O10 C35 Cd2 58.5(3) . . ?
O9 C35 Cd2 63.8(3) . . ?
C36 C35 Cd2 176.5(5) . . ?
C34 O7 Cd2 96.2(6) . . ?
C3 C4 C5 118.0(5) . . ?
C3 C4 H4 121.0 . . ?
C5 C4 H4 121.0 . . ?
C15 C14 C13 120.3(6) . . ?
C15 C14 H14 119.8 . . ?
C13 C14 H14 119.8 . . ?
C44 N5 C42 108.7(6) . . ?
C44 N5 C39 126.5(6) . . ?
C42 N5 C39 124.8(6) . . ?
C11 C13 C14 118.7(6) . . ?
C11 C13 H13 120.7 . . ?
C14 C13 H13 120.7 . . ?
N6 C44 N5 107.8(7) . . ?
N6 C44 H44 126.1 . . ?
N5 C44 H44 126.1 . . ?
C38 C39 C40 121.6(7) . . ?
C38 C39 N5 118.2(7) . . ?
C40 C39 N5 120.2(6) . . ?
C15 C16 C17 122.3(6) . . ?
C15 C16 H16 118.8 . . ?
C17 C16 H16 118.8 . . ?
C23 C24 C19 119.9(6) . . ?
C23 C24 H24 120.0 . . ?
C19 C24 H24 120.0 . . ?
C2 C3 C4 122.2(6) . . ?
C2 C3 H3 118.9 . . ?
C4 C3 H3 118.9 . . ?
C6 C7 C2 122.3(5) . . ?
C6 C7 H7 118.9 . . ?
C2 C7 H7 118.9 . . ?
O'1 C'1 N7 124.4(7) . . ?
O'1 C'1 H'1 117.8 . . ?
N7 C'1 H'1 117.8 . . ?
C24 C23 C22 120.9(6) . . ?
C24 C23 H23 119.5 . . ?
C22 C23 H23 119.5 . . ?
N3 C27 N4 106.9(6) . . ?
N3 C27 H27 126.6 . . ?
N4 C27 H27 126.6 . . ?
O1 C1 O2 121.6(6) . . ?
O1 C1 C2 117.9(5) . . ?
O2 C1 C2 120.5(6) . . ?
O1 C1 Cd1 54.9(3) . 6_545 ?
O2 C1 Cd1 66.7(3) . 6_545 ?
C2 C1 Cd1 172.5(4) . 6_545 ?
C25 C26 N4 108.4(7) . . ?
C25 C26 H26 125.8 . . ?
N4 C26 H26 125.8 . . ?
C21 C20 C19 122.3(6) . . ?
C21 C20 H20 118.9 . . ?
C19 C20 H20 118.9 . . ?
C32 C31 C30 119.8(7) . . ?
C32 C31 C34 118.9(7) . . ?
C30 C31 C34 121.3(7) . . ?
C20 C21 C22 118.4(6) . . ?
C20 C21 H21 120.8 . . ?
C22 C21 H21 120.8 . . ?
C23 C22 C21 120.1(6) . . ?
C23 C22 N3 120.8(6) . . ?
C21 C22 N3 119.0(6) . . ?
C29 C28 C33 123.0(8) . . ?
C29 C28 N4 120.4(7) . . ?
C33 C28 N4 116.6(7) . . ?
C41 C40 C39 117.7(7) . . ?
C41 C40 H40 121.1 . . ?
C39 C40 H40 121.1 . . ?
C39 C38 C37 119.6(7) . . ?
C39 C38 H38 120.2 . . ?
C37 C38 H38 120.2 . . ?
N7 C'3 H'3A 109.5 . . ?
N7 C'3 H'3B 109.5 . . ?
H'3A C'3 H'3B 109.5 . . ?
N7 C'3 H'3C 109.5 . . ?
H'3A C'3 H'3C 109.5 . . ?
H'3B C'3 H'3C 109.5 . . ?
C43 C42 N5 105.6(7) . . ?
C43 C42 H42 127.2 . . ?
N5 C42 H42 127.2 . . ?
C37 C36 C41 117.8(6) . . ?
C37 C36 C35 120.8(6) . . ?
C41 C36 C35 121.4(7) . . ?
N7 C'2 H'2A 109.5 . . ?
N7 C'2 H'2B 109.5 . . ?
H'2A C'2 H'2B 109.5 . . ?
N7 C'2 H'2C 109.5 . . ?
H'2A C'2 H'2C 109.5 . . ?
H'2B C'2 H'2C 109.5 . . ?
C42 C43 N6 108.3(7) . . ?
C42 C43 H43 125.8 . . ?
N6 C43 H43 125.8 . . ?
C28 C29 C30 118.8(8) . . ?
C28 C29 H29 120.6 . . ?
C30 C29 H29 120.6 . . ?
C40 C41 C36 122.7(7) . . ?
C40 C41 H41 118.7 . . ?
C36 C41 H41 118.7 . . ?
C31 C30 C29 120.4(7) . . ?
C31 C30 H30 119.8 . . ?
C29 C30 H30 119.8 . . ?
C28 C33 C32 116.8(8) . . ?
C28 C33 H33 121.6 . . ?
C32 C33 H33 121.6 . . ?
C36 C37 C38 120.6(7) . . ?
C36 C37 H37 119.7 . . ?
C38 C37 H37 119.7 . . ?
C26 C25 N3 105.5(7) . . ?
C26 C25 H25 127.3 . . ?
N3 C25 H25 127.3 . . ?
C31 C32 C33 120.9(8) . . ?
C31 C32 H32 119.6 . . ?
C33 C32 H32 119.6 . . ?
C1 O2 Cd1 86.2(4) . 6_545 ?
C34 O8 Cd2 94.3(5) . . ?
C48 C45 C46 120.7(6) . . ?
C48 C45 N6 118.3(7) . . ?
C46 C45 N6 120.9(7) . . ?
C45 C48 C49 120.0(7) . . ?
C45 C48 H48 120.0 . . ?
C49 C48 H48 120.0 . . ?
C45 C46 C47 120.2(7) . . ?
C45 C46 H46 119.9 . . ?
C47 C46 H46 119.9 . . ?
C50 C47 C46 119.3(7) . . ?
C50 C47 H47 120.4 . . ?
C46 C47 H47 120.4 . . ?
C47 C50 C49 119.8(6) . . ?
C47 C50 C51 119.2(7) . . ?
C49 C50 C51 121.0(6) . . ?
O12 C51 O11 126.6(6) . . ?
O12 C51 C50 120.0(7) . . ?
O11 C51 C50 113.4(7) . . ?
C48 C49 C50 120.2(7) . . ?
C48 C49 H49 119.9 . . ?
C50 C49 H49 119.9 . . ?
C51 O11 Cd2 122.2(4) . 6_576 ?
N8 O14 Cd1 98.8(9) . . ?
N8 O15 Cd1 111.4(9) . . ?
O15 N8 O14 100.9(16) . . ?
O15 N8 O16 137.2(10) . . ?
O14 N8 O16 109.7(11) . . ?
 
loop_
 _geom_torsion_atom_site_label_1
 _geom_torsion_atom_site_label_2
 _geom_torsion_atom_site_label_3
 _geom_torsion_atom_site_label_4
 _geom_torsion
 _geom_torsion_site_symmetry_1
 _geom_torsion_site_symmetry_2
 _geom_torsion_site_symmetry_3
 _geom_torsion_site_symmetry_4
 _geom_torsion_publ_flag
O4 Cd1 O5 N23 -59.7(4) . . . . ?
O1 Cd1 O5 N23 95.8(3) 6_546 . . . ?
O6 Cd1 O5 N23 -0.8(3) . . . . ?
O15 Cd1 O5 N23 -174.7(4) . . . . ?
O3 Cd1 O5 N23 -92.9(3) . . . . ?
O2 Cd1 O5 N23 58.1(4) 6_546 . . . ?
O14 Cd1 O5 N23 173.8(4) . . . . ?
C18 Cd1 O5 N23 -77.5(4) . . . . ?
C1 Cd1 O5 N23 79.8(4) 6_546 . . . ?
O4 Cd1 O3 C18 -3.4(4) . . . . ?
O1 Cd1 O3 C18 -155.3(8) 6_546 . . . ?
O6 Cd1 O3 C18 91.9(4) . . . . ?
O15 Cd1 O3 C18 -134.9(4) . . . . ?
O5 Cd1 O3 C18 146.2(4) . . . . ?
O2 Cd1 O3 C18 -2.0(5) 6_546 . . . ?
O14 Cd1 O3 C18 -88.1(4) . . . . ?
N23 Cd1 O3 C18 118.6(4) . . . . ?
C1 Cd1 O3 C18 -10.9(8) 6_546 . . . ?
O4 Cd1 O6 N23 140.5(4) . . . . ?
O1 Cd1 O6 N23 -84.5(4) 6_546 . . . ?
O15 Cd1 O6 N23 9.0(5) . . . . ?
O5 Cd1 O6 N23 0.8(3) . . . . ?
O3 Cd1 O6 N23 86.1(4) . . . . ?
O2 Cd1 O6 N23 -138.4(4) 6_546 . . . ?
C18 Cd1 O6 N23 113.1(4) . . . . ?
C1 Cd1 O6 N23 -111.3(4) 6_546 . . . ?
O11 Cd2 O9 C35 -111.8(4) 6_575 . . . ?
O10 Cd2 O9 C35 2.3(4) . . . . ?
O7 Cd2 O9 C35 141.4(4) . . . . ?
O'1 Cd2 O9 C35 -16.8(5) . . . . ?
O8 Cd2 O9 C35 97.1(4) . . . . ?
C34 Cd2 O9 C35 123.7(4) . . . . ?
O1 Cd1 O4 C18 176.7(4) 6_546 . . . ?
O6 Cd1 O4 C18 -83.0(4) . . . . ?
O15 Cd1 O4 C18 59.0(4) . . . . ?
O5 Cd1 O4 C18 -38.7(5) . . . . ?
O3 Cd1 O4 C18 3.3(4) . . . . ?
O2 Cd1 O4 C18 -175.7(4) 6_546 . . . ?
O14 Cd1 O4 C18 100.6(4) . . . . ?
N23 Cd1 O4 C18 -64.7(4) . . . . ?
C1 Cd1 O4 C18 -179.1(4) 6_546 . . . ?
O11 Cd2 O10 C35 88.0(4) 6_575 . . . ?
O7 Cd2 O10 C35 -59.3(5) . . . . ?
O'1 Cd2 O10 C35 165.6(4) . . . . ?
O8 Cd2 O10 C35 -115.9(4) . . . . ?
O9 Cd2 O10 C35 -2.3(4) . . . . ?
C34 Cd2 O10 C35 -91.6(4) . . . . ?
O11 Cd2 O'1 C'1 -120.7(6) 6_575 . . . ?
O10 Cd2 O'1 C'1 119.6(6) . . . . ?
O7 Cd2 O'1 C'1 -17.3(7) . . . . ?
O8 Cd2 O'1 C'1 8.4(6) . . . . ?
O9 Cd2 O'1 C'1 135.3(5) . . . . ?
C35 Cd2 O'1 C'1 126.8(6) . . . . ?
C34 Cd2 O'1 C'1 -6.6(6) . . . . ?
C10 N1 C5 C4 22.0(8) . . . . ?
C8 N1 C5 C4 -154.0(6) . . . . ?
C10 N1 C5 C6 -160.1(6) . . . . ?
C8 N1 C5 C6 23.8(9) . . . . ?
C10 N1 C8 C9 -0.3(7) . . . . ?
C5 N1 C8 C9 176.3(5) . . . . ?
C10 N2 C11 C17 139.8(6) . . . . ?
C9 N2 C11 C17 -49.7(9) . . . . ?
C10 N2 C11 C13 -40.0(9) . . . . ?
C9 N2 C11 C13 130.6(6) . . . . ?
C9 N2 C10 N1 0.2(6) . . . . ?
C11 N2 C10 N1 172.2(5) . . . . ?
C8 N1 C10 N2 0.1(7) . . . . ?
C5 N1 C10 N2 -176.5(5) . . . . ?
Cd1 O6 N23 O5 -1.5(6) . . . . ?
Cd1 O6 N23 C19 177.6(5) . . . . ?
Cd1 O5 N23 O6 1.4(6) . . . . ?
Cd1 O5 N23 C19 -177.7(5) . . . . ?
O4 Cd1 N23 O6 -44.0(4) . . . . ?
O1 Cd1 N23 O6 97.0(4) 6_546 . . . ?
O15 Cd1 N23 O6 -173.1(4) . . . . ?
O5 Cd1 N23 O6 -178.6(6) . . . . ?
O3 Cd1 N23 O6 -93.1(4) . . . . ?
O2 Cd1 N23 O6 46.0(4) 6_546 . . . ?
O14 Cd1 N23 O6 170.3(5) . . . . ?
C18 Cd1 N23 O6 -69.2(4) . . . . ?
C1 Cd1 N23 O6 72.8(4) 6_546 . . . ?
O4 Cd1 N23 O5 134.6(3) . . . . ?
O1 Cd1 N23 O5 -84.4(3) 6_546 . . . ?
O6 Cd1 N23 O5 178.6(6) . . . . ?
O15 Cd1 N23 O5 5.4(4) . . . . ?
O3 Cd1 N23 O5 85.5(3) . . . . ?
O2 Cd1 N23 O5 -135.5(3) 6_546 . . . ?
O14 Cd1 N23 O5 -11.1(7) . . . . ?
C18 Cd1 N23 O5 109.4(3) . . . . ?
C1 Cd1 N23 O5 -108.6(3) 6_546 . . . ?
O6 N23 C19 C20 -1.8(9) . . . . ?
O5 N23 C19 C20 177.4(6) . . . . ?
O6 N23 C19 C24 174.2(6) . . . . ?
O5 N23 C19 C24 -6.7(9) . . . . ?
N1 C8 C9 N2 0.4(7) . . . . ?
C10 N2 C9 C8 -0.3(7) . . . . ?
C11 N2 C9 C8 -172.2(6) . . . . ?
C4 C5 C6 C7 1.8(9) . . . . ?
N1 C5 C6 C7 -176.0(5) . . . . ?
O10 Cd2 C34 O7 105.6(7) . . . . ?
O'1 Cd2 C34 O7 -159.9(7) . . . . ?
O8 Cd2 C34 O7 165.2(10) . . . . ?
O9 Cd2 C34 O7 44.8(7) . . . . ?
C35 Cd2 C34 O7 72.5(7) . . . . ?
O11 Cd2 C34 O8 120.7(6) 6_575 . . . ?
O10 Cd2 C34 O8 -59.6(6) . . . . ?
O7 Cd2 C34 O8 -165.2(10) . . . . ?
O'1 Cd2 C34 O8 34.9(6) . . . . ?
O9 Cd2 C34 O8 -120.5(5) . . . . ?
C35 Cd2 C34 O8 -92.7(6) . . . . ?
Cd1 O3 C18 O4 5.9(7) . . . . ?
Cd1 O3 C18 C15 -172.8(6) . . . . ?
Cd1 O4 C18 O3 -6.6(8) . . . . ?
Cd1 O4 C18 C15 172.1(5) . . . . ?
O4 Cd1 C18 O3 174.0(7) . . . . ?
O1 Cd1 C18 O3 166.4(5) 6_546 . . . ?
O6 Cd1 C18 O3 -88.0(4) . . . . ?
O15 Cd1 C18 O3 45.4(4) . . . . ?
O5 Cd1 C18 O3 -35.7(4) . . . . ?
O2 Cd1 C18 O3 178.5(4) 6_546 . . . ?
O14 Cd1 C18 O3 94.0(4) . . . . ?
N23 Cd1 C18 O3 -63.1(4) . . . . ?
C1 Cd1 C18 O3 175.3(3) 6_546 . . . ?
O1 Cd1 C18 O4 -7.6(8) 6_546 . . . ?
O6 Cd1 C18 O4 98.0(4) . . . . ?
O15 Cd1 C18 O4 -128.6(4) . . . . ?
O5 Cd1 C18 O4 150.3(4) . . . . ?
O3 Cd1 C18 O4 -174.0(7) . . . . ?
O2 Cd1 C18 O4 4.5(4) 6_546 . . . ?
O14 Cd1 C18 O4 -80.0(4) . . . . ?
N23 Cd1 C18 O4 122.9(4) . . . . ?
C1 Cd1 C18 O4 1.3(5) 6_546 . . . ?
O4 Cd1 C18 C15 -40(2) . . . . ?
O1 Cd1 C18 C15 -47(3) 6_546 . . . ?
O6 Cd1 C18 C15 58(2) . . . . ?
O15 Cd1 C18 C15 -168(2) . . . . ?
O5 Cd1 C18 C15 111(2) . . . . ?
O3 Cd1 C18 C15 146(3) . . . . ?
O2 Cd1 C18 C15 -35(3) 6_546 . . . ?
O14 Cd1 C18 C15 -120(2) . . . . ?
N23 Cd1 C18 C15 83(2) . . . . ?
C1 Cd1 C18 C15 -38(3) 6_546 . . . ?
O3 C18 C15 C14 156.0(7) . . . . ?
O4 C18 C15 C14 -22.8(9) . . . . ?
Cd1 C18 C15 C14 13(3) . . . . ?
O3 C18 C15 C16 -21.9(10) . . . . ?
O4 C18 C15 C16 159.3(6) . . . . ?
Cd1 C18 C15 C16 -165(2) . . . . ?
C13 C11 C17 C16 -0.4(9) . . . . ?
N2 C11 C17 C16 179.9(5) . . . . ?
Cd2 O10 C35 O9 4.3(7) . . . . ?
Cd2 O10 C35 C36 -177.2(5) . . . . ?
Cd2 O9 C35 O10 -4.1(6) . . . . ?
Cd2 O9 C35 C36 177.4(6) . . . . ?
O11 Cd2 C35 O10 -105.7(4) 6_575 . . . ?
O7 Cd2 C35 O10 133.7(4) . . . . ?
O'1 Cd2 C35 O10 -15.6(4) . . . . ?
O8 Cd2 C35 O10 76.3(4) . . . . ?
O9 Cd2 C35 O10 175.9(6) . . . . ?
C34 Cd2 C35 O10 107.3(4) . . . . ?
O11 Cd2 C35 O9 78.4(4) 6_575 . . . ?
O10 Cd2 C35 O9 -175.9(6) . . . . ?
O7 Cd2 C35 O9 -42.2(5) . . . . ?
O'1 Cd2 C35 O9 168.4(3) . . . . ?
O8 Cd2 C35 O9 -99.6(4) . . . . ?
C34 Cd2 C35 O9 -68.6(5) . . . . ?
O8 C34 O7 Cd2 14.1(10) . . . . ?
C31 C34 O7 Cd2 -173.7(7) . . . . ?
O11 Cd2 O7 C34 115.1(7) 6_575 . . . ?
O10 Cd2 O7 C34 -94.4(7) . . . . ?
O'1 Cd2 O7 C34 24.6(8) . . . . ?
O8 Cd2 O7 C34 -8.4(6) . . . . ?
O9 Cd2 O7 C34 -138.2(7) . . . . ?
C35 Cd2 O7 C34 -119.7(6) . . . . ?
C6 C5 C4 C3 -1.7(9) . . . . ?
N1 C5 C4 C3 176.2(5) . . . . ?
C16 C15 C14 C13 -1.8(10) . . . . ?
C18 C15 C14 C13 -179.7(6) . . . . ?
C17 C11 C13 C14 1.6(10) . . . . ?
N2 C11 C13 C14 -178.7(6) . . . . ?
C15 C14 C13 C11 -0.5(10) . . . . ?
C43 N6 C44 N5 1.0(9) . . . . ?
C45 N6 C44 N5 -175.4(7) . . . . ?
C42 N5 C44 N6 -0.4(9) . . . . ?
C39 N5 C44 N6 -178.7(7) . . . . ?
C44 N5 C39 C38 -157.3(8) . . . . ?
C42 N5 C39 C38 24.7(11) . . . . ?
C44 N5 C39 C40 21.5(12) . . . . ?
C42 N5 C39 C40 -156.5(8) . . . . ?
C14 C15 C16 C17 3.1(10) . . . . ?
C18 C15 C16 C17 -179.0(6) . . . . ?
C11 C17 C16 C15 -2.0(10) . . . . ?
C20 C19 C24 C23 -1.5(10) . . . . ?
N23 C19 C24 C23 -177.6(6) . . . . ?
C7 C2 C3 C4 3.1(9) . . . . ?
C1 C2 C3 C4 -172.8(6) . . . . ?
C5 C4 C3 C2 -0.9(9) . . . . ?
C5 C6 C7 C2 0.5(9) . . . . ?
C3 C2 C7 C6 -2.9(9) . . . . ?
C1 C2 C7 C6 173.0(6) . . . . ?
Cd2 O'1 C'1 N7 166.5(6) . . . . ?
C'2 N7 C'1 O'1 5.6(14) . . . . ?
C'3 N7 C'1 O'1 -179.6(8) . . . . ?
C19 C24 C23 C22 1.1(11) . . . . ?
C25 N3 C27 N4 0.1(9) . . . . ?
C22 N3 C27 N4 -176.8(7) . . . . ?
C26 N4 C27 N3 -0.4(9) . . . . ?
C28 N4 C27 N3 178.6(7) . . . . ?
Cd1 O1 C1 O2 -0.7(7) 6_545 . . . ?
Cd1 O1 C1 C2 177.3(5) 6_545 . . . ?
C3 C2 C1 O1 5.6(9) . . . . ?
C7 C2 C1 O1 -170.2(6) . . . . ?
C3 C2 C1 O2 -176.5(6) . . . . ?
C7 C2 C1 O2 7.8(9) . . . . ?
C27 N4 C26 C25 0.6(11) . . . . ?
C28 N4 C26 C25 -178.5(9) . . . . ?
C24 C19 C20 C21 2.4(10) . . . . ?
N23 C19 C20 C21 178.5(6) . . . . ?
O7 C34 C31 C32 -19.9(14) . . . . ?
O8 C34 C31 C32 152.0(9) . . . . ?
O7 C34 C31 C30 159.0(10) . . . . ?
O8 C34 C31 C30 -29.1(13) . . . . ?
C19 C20 C21 C22 -2.9(10) . . . . ?
C24 C23 C22 C21 -1.6(11) . . . . ?
C24 C23 C22 N3 176.8(7) . . . . ?
C20 C21 C22 C23 2.4(11) . . . . ?
C20 C21 C22 N3 -176.0(6) . . . . ?
C27 N3 C22 C23 24.6(11) . . . . ?
C25 N3 C22 C23 -151.9(8) . . . . ?
C27 N3 C22 C21 -157.1(7) . . . . ?
C25 N3 C22 C21 26.5(12) . . . . ?
C27 N4 C28 C29 154.5(9) . . . . ?
C26 N4 C28 C29 -26.6(14) . . . . ?
C27 N4 C28 C33 -24.1(13) . . . . ?
C26 N4 C28 C33 154.9(9) . . . . ?
C38 C39 C40 C41 -0.6(13) . . . . ?
N5 C39 C40 C41 -179.3(7) . . . . ?
C40 C39 C38 C37 0.0(13) . . . . ?
N5 C39 C38 C37 178.8(7) . . . . ?
C44 N5 C42 C43 -0.4(9) . . . . ?
C39 N5 C42 C43 177.9(7) . . . . ?
O10 C35 C36 C37 2.9(10) . . . . ?
O9 C35 C36 C37 -178.5(7) . . . . ?
O10 C35 C36 C41 -178.2(7) . . . . ?
O9 C35 C36 C41 0.4(10) . . . . ?
N5 C42 C43 N6 1.0(9) . . . . ?
C44 N6 C43 C42 -1.2(10) . . . . ?
C45 N6 C43 C42 175.3(7) . . . . ?
C33 C28 C29 C30 -5.1(16) . . . . ?
N4 C28 C29 C30 176.5(9) . . . . ?
C39 C40 C41 C36 -0.7(13) . . . . ?
C37 C36 C41 C40 2.4(13) . . . . ?
C35 C36 C41 C40 -176.5(8) . . . . ?
C32 C31 C30 C29 2.7(14) . . . . ?
C34 C31 C30 C29 -176.2(9) . . . . ?
C28 C29 C30 C31 1.7(15) . . . . ?
C29 C28 C33 C32 3.8(16) . . . . ?
N4 C28 C33 C32 -177.7(9) . . . . ?
C41 C36 C37 C38 -2.9(12) . . . . ?
C35 C36 C37 C38 176.0(7) . . . . ?
C39 C38 C37 C36 1.8(13) . . . . ?
N4 C26 C25 N3 -0.5(12) . . . . ?
C27 N3 C25 C26 0.2(11) . . . . ?
C22 N3 C25 C26 177.1(8) . . . . ?
C30 C31 C32 C33 -4.0(15) . . . . ?
C34 C31 C32 C33 174.9(9) . . . . ?
C28 C33 C32 C31 0.9(16) . . . . ?
O1 C1 O2 Cd1 0.6(6) . . . 6_545 ?
C2 C1 O2 Cd1 -177.3(6) . . . 6_545 ?
O7 C34 O8 Cd2 -13.9(10) . . . . ?
C31 C34 O8 Cd2 173.5(7) . . . . ?
O11 Cd2 O8 C34 -74.1(6) 6_575 . . . ?
O10 Cd2 O8 C34 132.1(5) . . . . ?
O7 Cd2 O8 C34 8.1(5) . . . . ?
O'1 Cd2 O8 C34 -145.5(6) . . . . ?
O9 Cd2 O8 C34 70.8(6) . . . . ?
C35 Cd2 O8 C34 103.6(6) . . . . ?
C44 N6 C45 C48 -141.4(8) . . . . ?
C43 N6 C45 C48 42.7(11) . . . . ?
C44 N6 C45 C46 41.9(11) . . . . ?
C43 N6 C45 C46 -134.1(8) . . . . ?
C46 C45 C48 C49 2.0(12) . . . . ?
N6 C45 C48 C49 -174.7(7) . . . . ?
C48 C45 C46 C47 -1.9(12) . . . . ?
N6 C45 C46 C47 174.7(7) . . . . ?
C45 C46 C47 C50 0.3(11) . . . . ?
C46 C47 C50 C49 1.2(11) . . . . ?
C46 C47 C50 C51 -175.9(6) . . . . ?
C47 C50 C51 O12 2.2(10) . . . . ?
C49 C50 C51 O12 -174.9(7) . . . . ?
C47 C50 C51 O11 -176.2(6) . . . . ?
C49 C50 C51 O11 6.7(9) . . . . ?
C45 C48 C49 C50 -0.5(12) . . . . ?
C47 C50 C49 C48 -1.1(11) . . . . ?
C51 C50 C49 C48 176.0(7) . . . . ?
O12 C51 O11 Cd2 -15.0(10) . . . 6_576 ?
C50 C51 O11 Cd2 163.3(4) . . . 6_576 ?
O4 Cd1 O14 N8 -130.4(5) . . . . ?
O1 Cd1 O14 N8 94.3(5) 6_546 . . . ?
O15 Cd1 O14 N8 -2.8(5) . . . . ?
O5 Cd1 O14 N8 12.3(6) . . . . ?
O3 Cd1 O14 N8 -76.2(5) . . . . ?
O2 Cd1 O14 N8 148.6(5) 6_546 . . . ?
C18 Cd1 O14 N8 -103.3(5) . . . . ?
N23 Cd1 O14 N8 18.6(9) . . . . ?
C1 Cd1 O14 N8 121.4(6) 6_546 . . . ?
O4 Cd1 O15 N8 65.3(6) . . . . ?
O1 Cd1 O15 N8 -75.3(6) 6_546 . . . ?
O6 Cd1 O15 N8 -171.1(5) . . . . ?
O5 Cd1 O15 N8 -164.4(6) . . . . ?
O3 Cd1 O15 N8 108.2(6) . . . . ?
O2 Cd1 O15 N8 -32.6(6) 6_546 . . . ?
O14 Cd1 O15 N8 3.2(6) . . . . ?
C18 Cd1 O15 N8 89.1(6) . . . . ?
N23 Cd1 O15 N8 -166.9(6) . . . . ?
C1 Cd1 O15 N8 -56.3(6) 6_546 . . . ?
Cd1 O15 N8 O14 -4.6(8) . . . . ?
Cd1 O15 N8 O16 131(2) . . . . ?
Cd1 O14 N8 O15 4.0(7) . . . . ?
Cd1 O14 N8 O16 -145.6(13) . . . . ?
 
_diffrn_measured_fraction_theta_max    0.987
_diffrn_reflns_theta_full              25.00
_diffrn_measured_fraction_theta_full   0.999
_refine_diff_density_max    1.104
_refine_diff_density_min   -0.888
_refine_diff_density_rms    0.120

# SQUEEZE RESULTS (APPEND TO CIF)
# Note: Data are Listed for all Voids in the P1 Unit Cell
# i.e. Centre of Gravity, Solvent Accessible Volume,
# Recovered number of Electrons in the Void and
# Details about the Squeezed Material
loop_
  _platon_squeeze_void_nr
  _platon_squeeze_void_average_x
  _platon_squeeze_void_average_y
  _platon_squeeze_void_average_z
  _platon_squeeze_void_volume
  _platon_squeeze_void_count_electrons
  _platon_squeeze_void_content
   1  0.500  0.466  0.250      1378       403 ' '
   2  1.000  0.034  0.250      1378       403 ' '
   3  0.500  0.531  0.750      1379       401 ' '
   4  1.000  0.031  0.750      1379       401 ' '  
_platon_squeeze_details
;
;
